# Supplementary material for: In−situ observation for RH−dependent mixing states of submicron particles containing organic surfactants and inorganic salts
Source: Copernicus journal article supplement (doi:10.5194/egusphere-2023-849), 2023-05-04
Supplement: Supplementary file 1 [file egusphere-2023-849-supplement.pdf]

1 Supplemental materials for

2 **In-situ observation for RH-dependent mixing states of submicron**  
3 **particles containing organic surfactants and inorganic salts**

4 Chun Xiong<sup>1#</sup>, Binyu Kuang<sup>1#</sup>, Fei Zhang<sup>1</sup>, Xiangyu Pei<sup>1</sup>, Zhengning Xu<sup>1</sup>, Zhibin Wang<sup>1,2,3\*</sup>

5

6 <sup>1</sup>College of Environmental and Resource Sciences, Zhejiang University, Zhejiang Provincial Key  
7 Laboratory of Organic Pollution Process and Control, Hangzhou, China

8 <sup>2</sup>ZJU-Hangzhou Global Scientific and Technological Innovation Center, Hangzhou, China

9 <sup>3</sup>Key Laboratory of Environment Remediation and Ecological Health, Ministry of Education, Zhejiang  
10 University, Hangzhou, China

11 \*Correspondence to Zhibin Wang ([wangzhibin@zju.edu.cn](mailto:wangzhibin@zju.edu.cn))

12 # Chun Xiong and Binyu Kuang contribute equally to this work.

13

14 Figure S1-S2

15

16

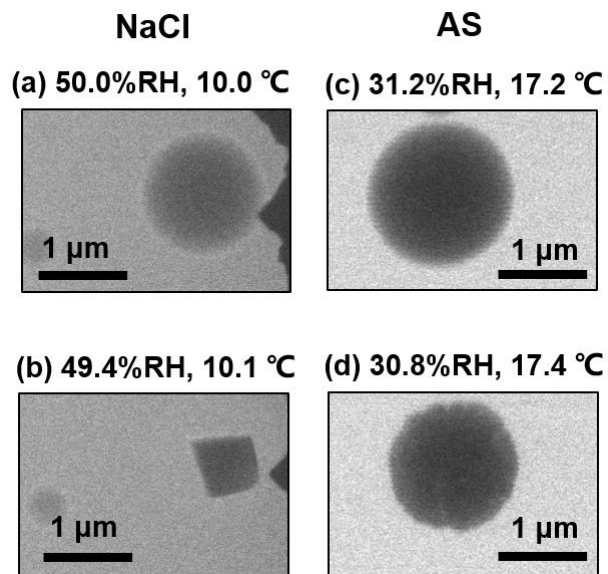

**Figure S1** ESEM images of efflorescence processes for (a–b) NaCl and (c–d) AS particles.

17  
18  
19  
20

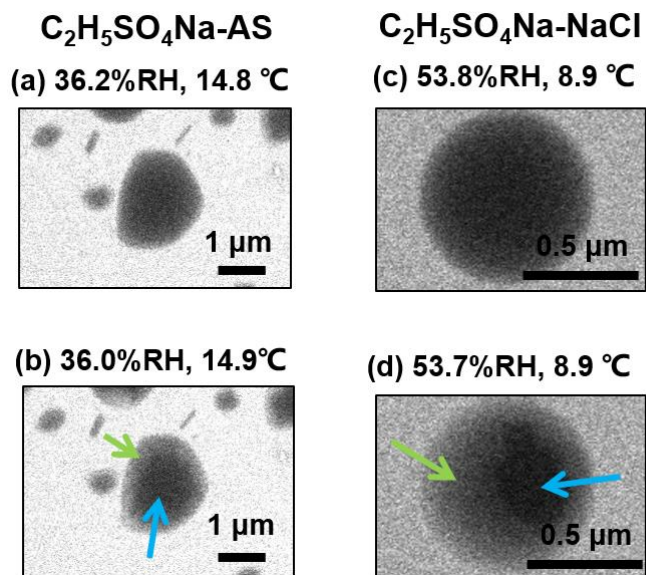

22

23

24 **Figure S2.** ESEM images of efflorescence of (a–b) AS–C<sub>2</sub>H<sub>5</sub>SO<sub>4</sub>Na and (c–d) NaCl–C<sub>2</sub>H<sub>5</sub>SO<sub>4</sub>Na with

25 70% OVF.

26
